# Supplementary material for: Niclosamide, but not ivermectin, inhibits anoctamin 1 and 6 and attenuates inflammation of the respiratory tract
Source: Springer Nature journal article supplement (doi:10.1007/s00424-023-02878-w), 2023-11-18
Supplement: MOESM1 [file 424_2023_2878_MOESM1_ESM.pdf]

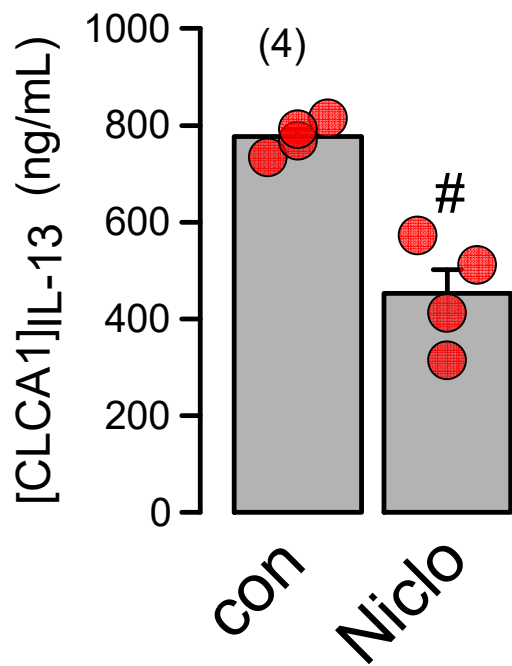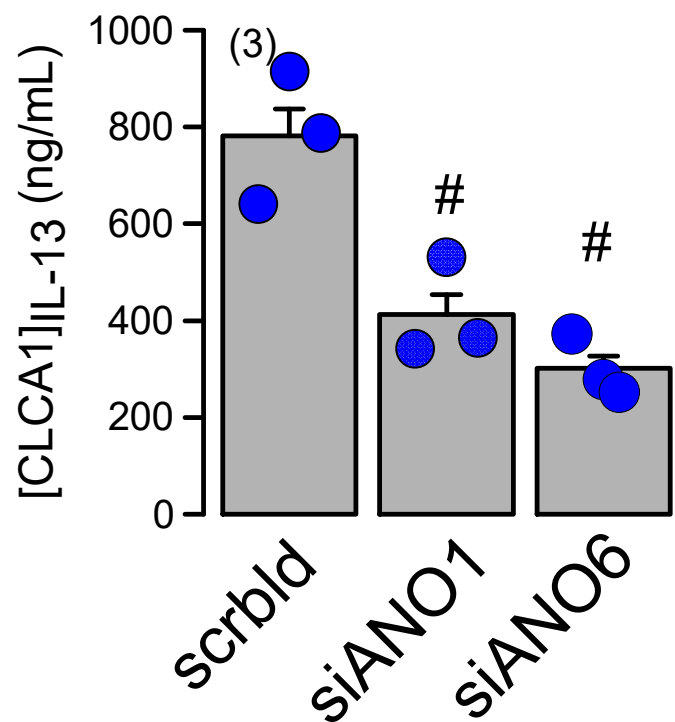

**Supplementary Figure 1.** *Inhibition of IL-13 - induced CLCA1 release by niclosamide and siRNA knockdown of ANO1 or ANO6.* Summary of CLCA1-release from CFBE human airway epithelial cells after incubation of the cells for 48 hrs with IL-13 (100 ng/ml). Cells were exposed to niclosamide (1  $\mu$ M) or scrambled RNA, siRNA-ANO1 or siRNA-ANO6 for 72 hrs #( $p < 0.05$ ; unpaired t-test).
